# Supplementary material for: Health status of and health-care provision to asylum seekers in Germany: protocol for a systematic review and evidence mapping of empirical studies
Source: PubMed Central journal article supplement (PMC4259011; doi:10.1186/2046-4053-3-139), 2014-11-29
Supplement: 13643_2014_305_MOESM1_ESM.pdf [file 13643_2014_305_MOESM1_ESM.pdf]

## Additional File 1: Search Strategy

Supplement to: Schneider C, Mohsenpour A, Joos S, Bozorgmehr K: Health status of and healthcare provision to asylum seekers in Germany: Protocol for a systematic review and evidence mapping of empirical studies

### Databases searched on DD/MM/YYYY by AM and CS

| Database                              | Search Term                                                                                              | Link                                                                                  |
|---------------------------------------|----------------------------------------------------------------------------------------------------------|---------------------------------------------------------------------------------------|
| Pubmed                                | ((refugee* OR asylum*) AND (health* OR access OR utilization) AND german*)                               | <a href="http://www.ncbi.nlm.nih.gov/pubmed/">http://www.ncbi.nlm.nih.gov/pubmed/</a> |
| ISI Web of Science                    | ((refugee* OR asylum*) AND (health* OR access OR utilization) AND german*)                               | <a href="https://webofknowledge.com">https://webofknowledge.com</a>                   |
| IBSS                                  | ((refugee* OR asylum*) AND (health* OR access OR utilization) AND german*)                               | <a href="http://search.proquest.com/ibss">http://search.proquest.com/ibss</a>         |
| Medpilot                              | (refugee* OR asylum*) AND (health* OR access OR utilization) AND german*                                 | <a href="http://www.medpilot.de/">http://www.medpilot.de/</a>                         |
| Medpilot                              | (Asyl* OR Flüchtling*) AND gesundheit*                                                                   | <a href="http://www.medpilot.de/">http://www.medpilot.de/</a>                         |
| Sociological Abstracts                | (refugee* OR asylum*) AND (health* OR access OR utilization) AND german*                                 | <a href="http://search.proquest.com/socabs">http://search.proquest.com/socabs</a>     |
| Social Science Citation Index         | (refugee* OR asylum*) AND (health* OR access OR utilization) AND german*                                 | <a href="https://webofknowledge.com">https://webofknowledge.com</a>                   |
| CINAHL                                | (refugee* OR asylum*) AND (health* OR access OR utilization) AND german*                                 | via EBSCO Host                                                                        |
| ASSIA                                 | (refugee* OR asylum*) AND (health* OR access OR utilization) AND german*                                 | <a href="http://search.proquest.com/assia">http://search.proquest.com/assia</a>       |
| Worldwide Political Science Abstracts | (refugee* OR asylum*) AND (health* OR access OR utilization) AND german*                                 | <a href="http://search.proquest.com/wpsa">http://search.proquest.com/wpsa</a>         |
| Sowiport                              | Flüchtling* OR asyl* AND gesundheit*                                                                     | <a href="http://www.gesis.org/sowiport/">http://www.gesis.org/sowiport/</a>           |
| Sowiport                              | refugee* OR asylum* AND health* AND german*                                                              | <a href="http://www.gesis.org/sowiport/">http://www.gesis.org/sowiport/</a>           |
| Deutsche Nationalbibliothek           | Flüchtling* OR asyl* AND gesundheit*                                                                     | <a href="http://dnb.dnb.de/">http://dnb.dnb.de/</a>                                   |
| Google                                | (Asyl* ODER Flüchtling*) UND (Gesundheit ODER Gesundheitsversorgung) UND (Studie ODER qual* ODER quant*) | <a href="http://www.google.com">www.google.com</a>                                    |
| Google                                | (refugee* OR asylum*) AND (health* OR access OR utilization OR use*) AND german*                         | <a href="http://www.google.com">www.google.com</a>                                    |
| Google                                | (refugee* OR asylum*) AND health* AND study* AND german*                                                 | <a href="http://www.google.com">www.google.com</a>                                    |
